# Supplementary material for: Data assimilation of volcanic aerosol observations using FALL3D+PDAF
Source: Copernicus journal article supplement (doi:10.5194/acp-22-1773-2022), 2022-02-07
Supplement: Supplementary file 1 [file acp-22-1773-2022-supplement.zip]

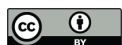

## *Supplement of*

# **Data assimilation of volcanic aerosol observations using FALL3D+PDAF**

**Leonardo Mingari et al.**

*Correspondence to:* Leonardo Mingari ([leonardo.mingari@bsc.es](mailto:leonardo.mingari@bsc.es))

- [acp-22-1773-2022-supplement-title-page.pdf](#)
- supplementary
  - [col-mass-x3.mp4](#)
  - [contours.mp4](#)

The copyright of individual parts of the supplement might differ from the article licence.
